# Supplementary material for: Chemonastic Stalked Glands in the Carnivorous Rainbow Plant Byblis gigantea LINDL. (Byblidaceae, Lamiales)
Source: MDPI journal article supplement (doi:10.3390/ijms231911514), 2022-09-29
Supplement: s1 [file s1]

SUPPLEMENTARY MATERIALS FOR

**Chemonastic stalked glands in the carnivorous rainbow plant *Byblis gigantea* LINDL. (Byblidaceae, Lamiales)**

S. Poppinga<sup>1,\*</sup>, N. Knorr<sup>2,3,§</sup>, S. Ruppert<sup>2,§</sup>, T. Speck<sup>2,3</sup>

<sup>1</sup>Botanical Garden, Department of Biology, Technical University of Darmstadt, Darmstadt, Germany

<sup>2</sup>Botanical Garden, University of Freiburg, Freiburg im Breisgau, Germany

<sup>3</sup>Cluster of Excellence livMatS @ FIT – Freiburg Center for Interactive Materials and Bioinspired Technologies, University of Freiburg, Freiburg im Breisgau, Germany

<sup>§</sup>These authors contributed equally to this study

\*Corresponding author. E-mail: [simon.poppinga@tu-darmstadt.de](mailto:simon.poppinga@tu-darmstadt.de)

**Content:**

Figures S1-5

Tables S1-5

**Figure S1**

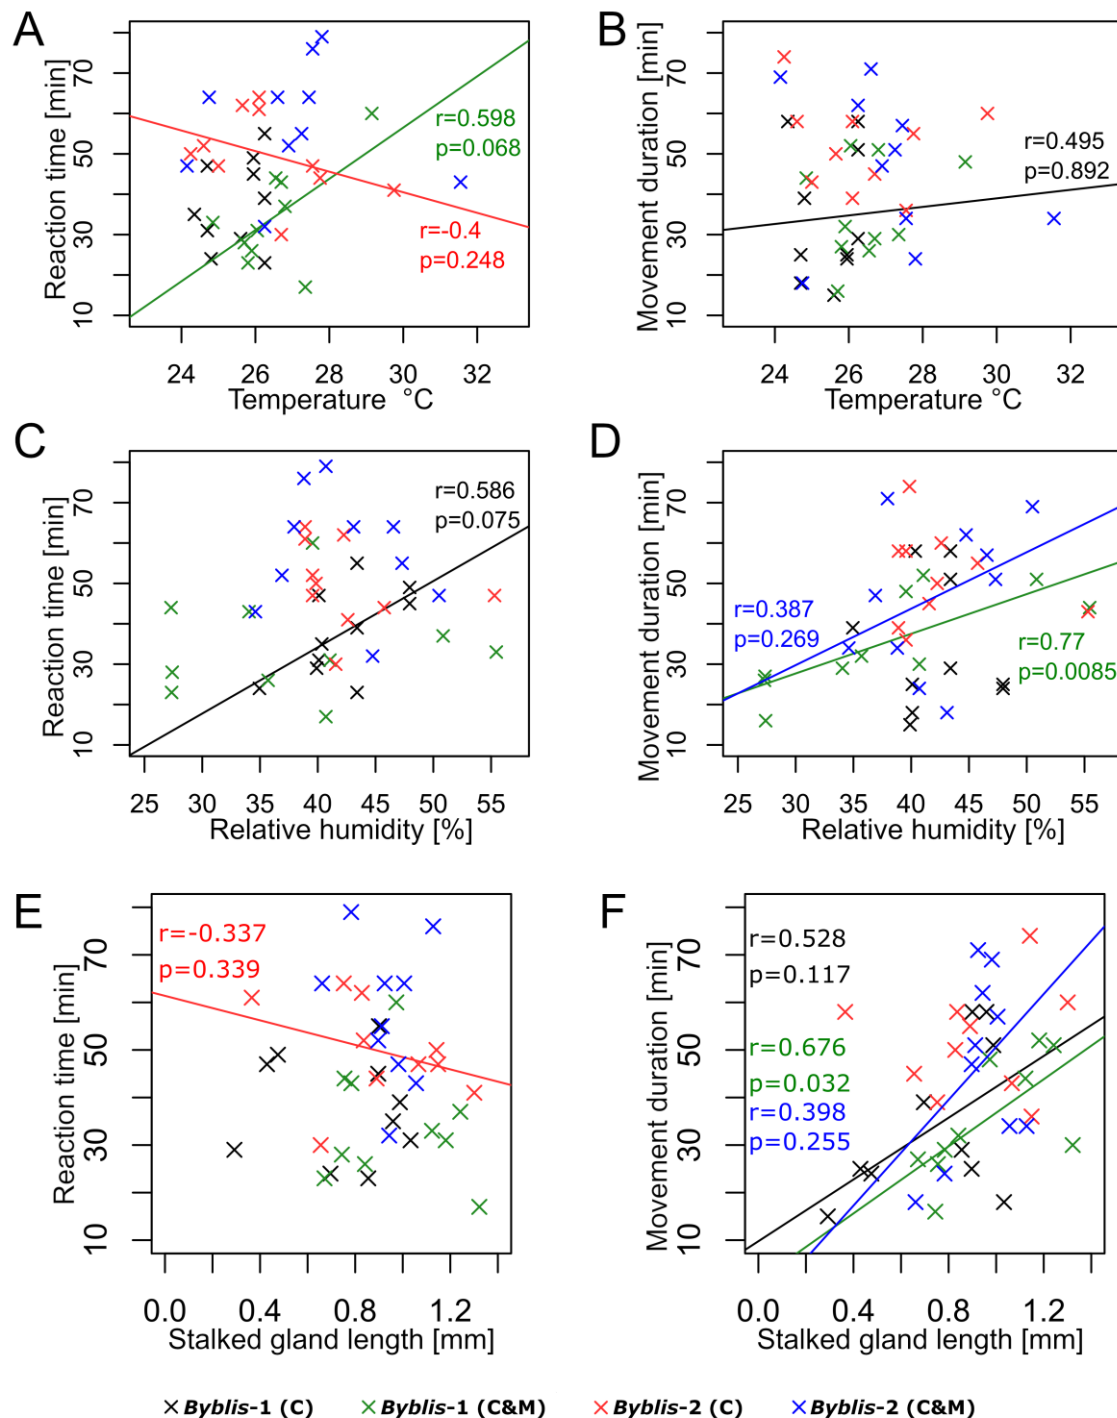

**Figure S1.** Shows the results from the correlation analyses between (A) reaction time and temperature, (B) movement duration and temperature, (C) reaction time and relative humidity, (D) movement duration and humidity, (E) reaction time and stalked gland length, and (F) movement duration and stalked gland length. Indicated are the two tested plants (*Byblis-1* and *Byblis-2*) and the stimulation scenarios, i.e., pure chemical (C) and combined chemical and mechanical (C&M) stimulation.

**Figure S2**

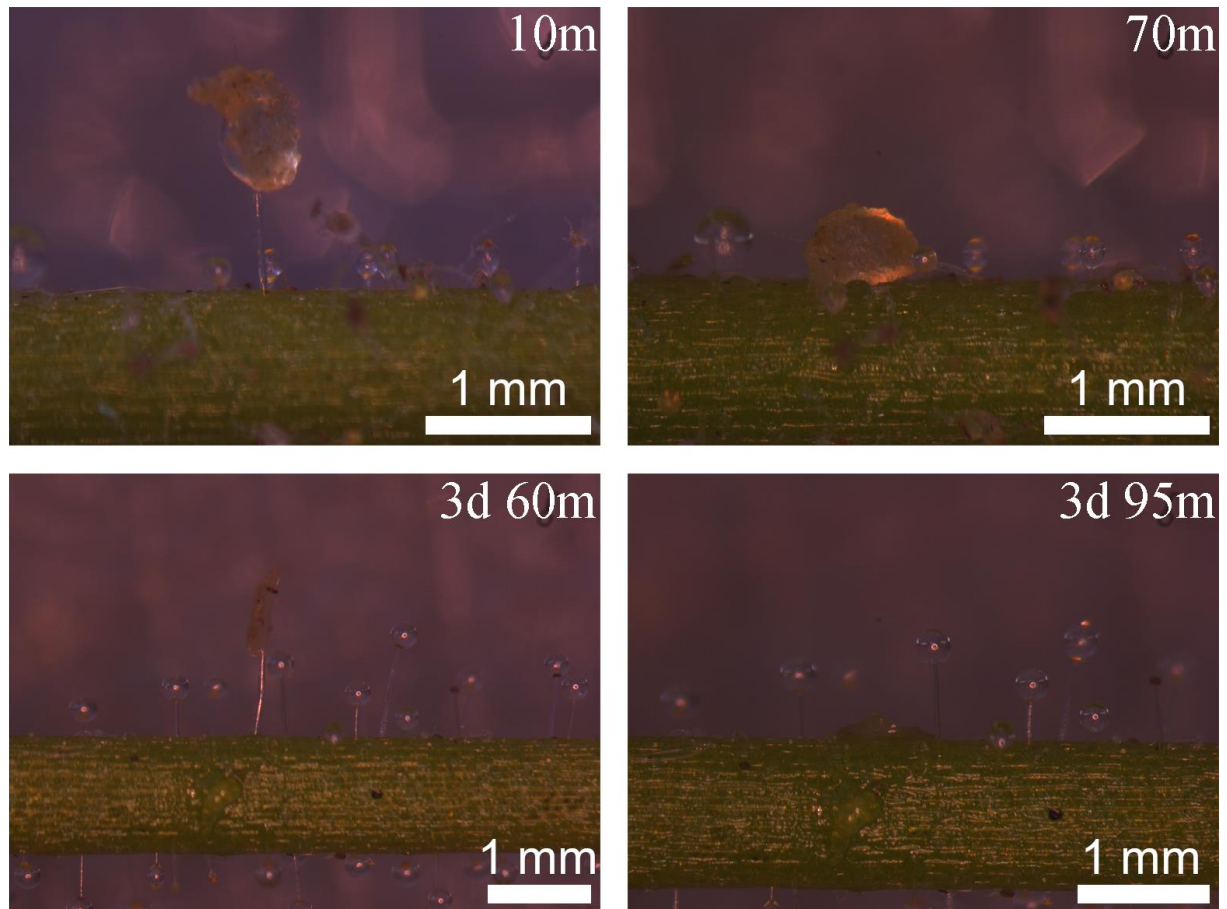

**Figure S2.** Shows the movement responses of stalked glands situated on the same cut-off leaf piece and stimulated with fish food flake fragments 10 minutes (upper images) and 3 days and 60 minutes (lower images) after detachment of the leaf piece.

**Figure S3**

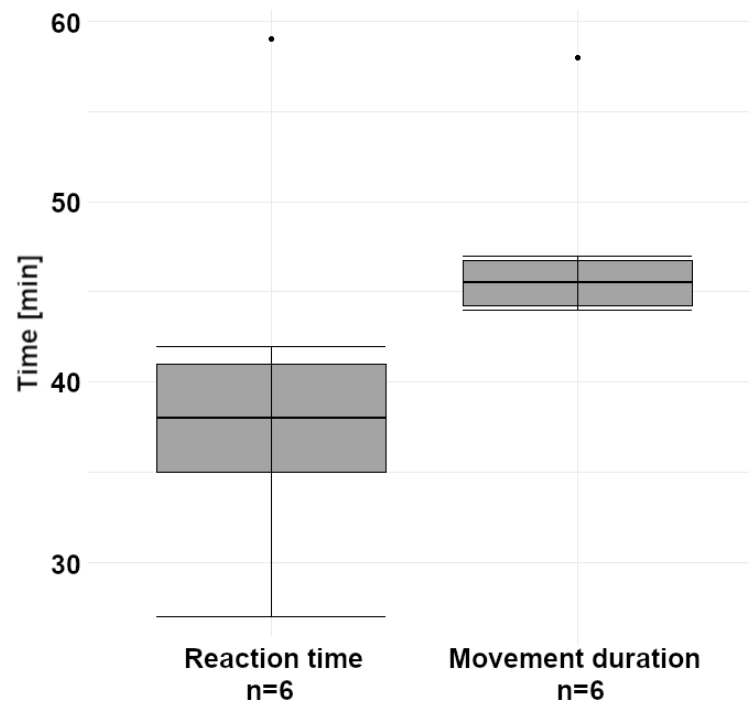

**Figure S3.** Shows reaction times and movement durations of stalked glands moving in paraffin oil.

**Figure S4**

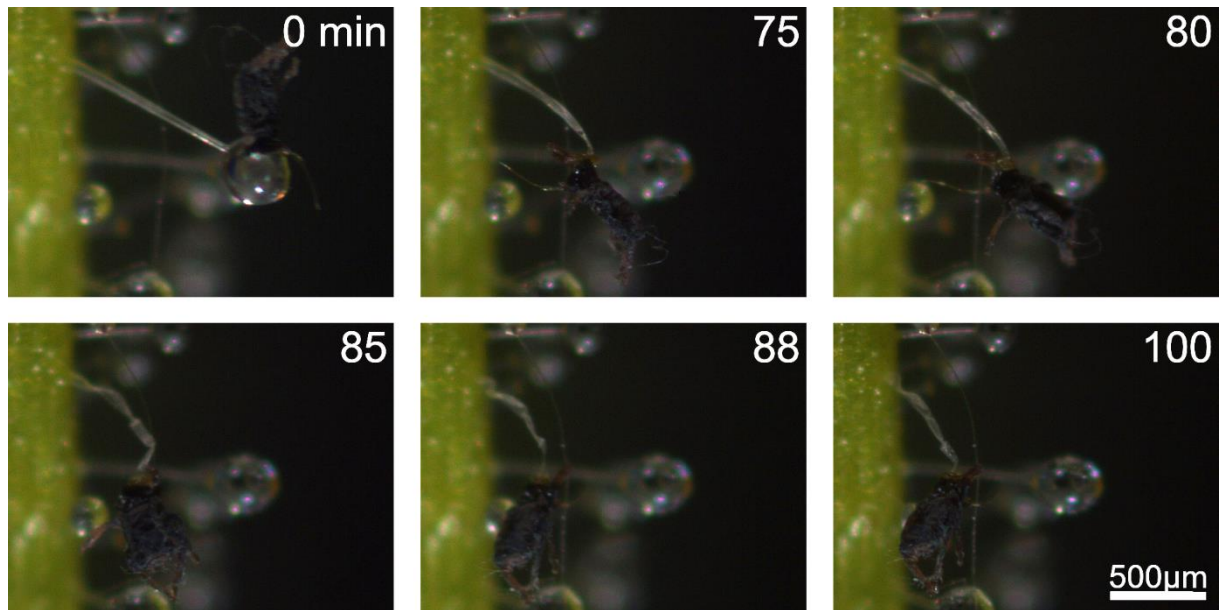

**Figure S4.** Shows the motion response and respective time scales [min] of a stalked gland stimulated with a dead aphid.

**Figure S5**

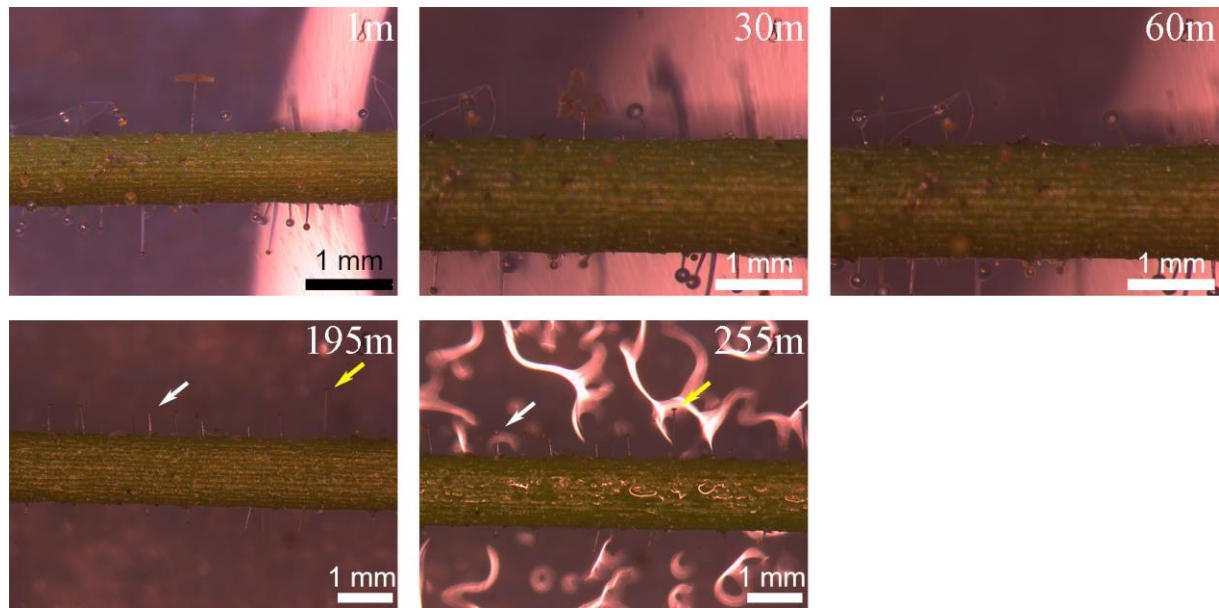

**Figure S5.** In the three upper images of Figure S5, the movement of a chemically stimulated stalked gland can be seen. The times indicated refer to the moment of stimulation. At minute 195, the rehydrated stalked gland (yellow arrow) and further other stalked glands (one indicated with a white arrow) are indicated. At minute 255, it can be seen that surrounding stalked glands produced glue drops, whereas the stimulated and rehydrated stalked gland did not produce glue.

**Table S1**

**Table S1.** Provides the original data for the stalked gland length measurements. US = upper surface of leaf; LS = lower surface of leaf.

| <b>Plant</b>    | <b>Stalked gland length [mm]</b> | <b>Position on leaf</b> |
|-----------------|----------------------------------|-------------------------|
| <i>Byblis-1</i> | 0.648                            | US                      |
| <i>Byblis-1</i> | 0.265                            | US                      |
| <i>Byblis-1</i> | 0.462                            | US                      |
| <i>Byblis-1</i> | 0.573                            | US                      |
| <i>Byblis-1</i> | 0.603                            | LS                      |
| <i>Byblis-1</i> | 0.703                            | LS                      |
| <i>Byblis-1</i> | 0.927                            | LS                      |
| <i>Byblis-1</i> | 0.494                            | LS                      |
| <i>Byblis-1</i> | 1.146                            | US                      |
| <i>Byblis-1</i> | 0.522                            | LS                      |
| <i>Byblis-1</i> | 0.595                            | US                      |
| <i>Byblis-1</i> | 0.935                            | US                      |
| <i>Byblis-1</i> | 0.885                            | LS                      |
| <i>Byblis-1</i> | 0.354                            | LS                      |
| <i>Byblis-1</i> | 0.43                             | US                      |
| <i>Byblis-1</i> | 0.636                            | US                      |
| <i>Byblis-1</i> | 0.693                            | LS                      |
| <i>Byblis-1</i> | 0.514                            | LS                      |
| <i>Byblis-1</i> | 1.062                            | LS                      |
| <i>Byblis-1</i> | 0.634                            | US                      |
| <i>Byblis-1</i> | 0.347                            | US                      |
| <i>Byblis-1</i> | 0.588                            | US                      |
| <i>Byblis-1</i> | 0.513                            | US                      |
| <i>Byblis-1</i> | 0.626                            | LS                      |
| <i>Byblis-1</i> | 0.853                            | LS                      |
| <i>Byblis-1</i> | 1.154                            | LS                      |
| <i>Byblis-1</i> | 0.897                            | US                      |
| <i>Byblis-1</i> | 0.475                            | US                      |
| <i>Byblis-1</i> | 0.981                            | US                      |
| <i>Byblis-1</i> | 0.784                            | LS                      |
| <i>Byblis-1</i> | 0.392                            | LS                      |
| <i>Byblis-1</i> | 0.378                            | LS                      |
| <i>Byblis-1</i> | 0.837                            | LS                      |
| <i>Byblis-1</i> | 0.445                            | LS                      |
| <i>Byblis-1</i> | 0.588                            | LS                      |
| <i>Byblis-1</i> | 0.653                            | US                      |
| <i>Byblis-1</i> | 0.637                            | US                      |
| <i>Byblis-1</i> | 0.757                            | LS                      |
| <i>Byblis-1</i> | 0.573                            | LS                      |
| <i>Byblis-1</i> | 1.11                             | LS                      |

|                  |       |    |
|------------------|-------|----|
| <i>Byblis</i> -1 | 1.132 | LS |
| <i>Byblis</i> -1 | 0.347 | LS |
| <i>Byblis</i> -1 | 0.536 | LS |
| <i>Byblis</i> -1 | 0.901 | LS |
| <i>Byblis</i> -1 | 0.354 | LS |
| <i>Byblis</i> -1 | 0.862 | US |
| <i>Byblis</i> -1 | 0.385 | US |
| <i>Byblis</i> -1 | 0.812 | US |
| <i>Byblis</i> -1 | 0.566 | LS |
| <i>Byblis</i> -1 | 0.564 | LS |
| <i>Byblis</i> -1 | 0.678 | LS |
| <i>Byblis</i> -1 | 0.897 | LS |
| <i>Byblis</i> -1 | 1.12  | US |
| <i>Byblis</i> -1 | 0.951 | LS |
| <i>Byblis</i> -1 | 0.46  | LS |
| <i>Byblis</i> -1 | 0.574 | LS |
| <i>Byblis</i> -1 | 0.579 | LS |
| <i>Byblis</i> -1 | 1.124 | US |
| <i>Byblis</i> -1 | 0.282 | US |
| <i>Byblis</i> -1 | 0.291 | US |
| <i>Byblis</i> -1 | 0.51  | US |
| <i>Byblis</i> -1 | 0.99  | US |
| <i>Byblis</i> -1 | 0.598 | LS |
| <i>Byblis</i> -1 | 0.639 | US |
| <i>Byblis</i> -1 | 0.569 | US |
| <i>Byblis</i> -1 | 0.285 | US |
| <i>Byblis</i> -1 | 0.365 | US |
| <i>Byblis</i> -1 | 1.059 | LS |
| <i>Byblis</i> -1 | 0.688 | LS |
| <i>Byblis</i> -1 | 0.642 | LS |
| <i>Byblis</i> -1 | 0.698 | LS |
| <i>Byblis</i> -1 | 0.867 | LS |
| <i>Byblis</i> -1 | 0.598 | US |
| <i>Byblis</i> -1 | 0.299 | US |
| <i>Byblis</i> -1 | 0.688 | LS |
| <i>Byblis</i> -1 | 0.253 | LS |
| <i>Byblis</i> -1 | 0.604 | LS |
| <i>Byblis</i> -1 | 0.752 | LS |
| <i>Byblis</i> -1 | 0.364 | US |
| <i>Byblis</i> -1 | 0.421 | US |
| <i>Byblis</i> -1 | 0.477 | US |
| <i>Byblis</i> -1 | 0.566 | LS |
| <i>Byblis</i> -1 | 0.631 | LS |
| <i>Byblis</i> -1 | 0.257 | US |
| <i>Byblis</i> -1 | 0.661 | US |
| <i>Byblis</i> -1 | 0.5   | LS |
| <i>Byblis</i> -1 | 0.737 | LS |



|                 |       |    |
|-----------------|-------|----|
| <i>Byblis-1</i> | 0.309 | US |
| <i>Byblis-1</i> | 0.892 | LS |
| <i>Byblis-1</i> | 0.853 | LS |
| <i>Byblis-1</i> | 1.146 | LS |
| <i>Byblis-1</i> | 0.468 | LS |
| <i>Byblis-1</i> | 1.027 | LS |
| <i>Byblis-1</i> | 1.102 | LS |
| <i>Byblis-1</i> | 0.908 | LS |
| <i>Byblis-1</i> | 0.931 | LS |
| <i>Byblis-1</i> | 1.213 | LS |
| <i>Byblis-1</i> | 0.646 | LS |
| <i>Byblis-1</i> | 0.613 | US |
| <i>Byblis-1</i> | 0.564 | US |
| <i>Byblis-1</i> | 0.691 | US |
| <i>Byblis-1</i> | 0.438 | US |
| <i>Byblis-1</i> | 0.565 | LS |
| <i>Byblis-1</i> | 0.923 | LS |
| <i>Byblis-1</i> | 0.829 | LS |
| <i>Byblis-1</i> | 1.304 | LS |
| <i>Byblis-1</i> | 0.936 | US |
| <i>Byblis-1</i> | 0.492 | US |
| <i>Byblis-1</i> | 0.733 | US |
| <i>Byblis-1</i> | 1.182 | LS |
| <i>Byblis-1</i> | 0.558 | LS |
| <i>Byblis-1</i> | 0.83  | LS |
| <i>Byblis-1</i> | 0.722 | US |
| <i>Byblis-1</i> | 0.686 | US |
| <i>Byblis-1</i> | 0.367 | US |
| <i>Byblis-1</i> | 0.845 | US |
| <i>Byblis-1</i> | 0.44  | LS |
| <i>Byblis-1</i> | 1.084 | LS |
| <i>Byblis-1</i> | 0.548 | LS |
| <i>Byblis-1</i> | 0.775 | LS |
| <i>Byblis-1</i> | 0.375 | LS |
| <i>Byblis-1</i> | 0.686 | US |
| <i>Byblis-1</i> | 0.944 | US |
| <i>Byblis-1</i> | 0.243 | US |
| <i>Byblis-1</i> | 0.467 | US |
| <i>Byblis-1</i> | 0.902 | US |
| <i>Byblis-1</i> | 0.852 | LS |
| <i>Byblis-1</i> | 0.92  | LS |
| <i>Byblis-1</i> | 0.611 | LS |
| <i>Byblis-1</i> | 0.816 | LS |
| <i>Byblis-1</i> | 0.93  | US |
| <i>Byblis-1</i> | 0.974 | US |
| <i>Byblis-1</i> | 0.287 | US |
| <i>Byblis-1</i> | 0.989 | LS |

|                 |       |    |
|-----------------|-------|----|
| <i>Byblis-1</i> | 0.907 | LS |
| <i>Byblis-1</i> | 0.607 | LS |
| <i>Byblis-1</i> | 0.847 | LS |
| <i>Byblis-1</i> | 0.423 | LS |
| <i>Byblis-1</i> | 0.484 | LS |
| <i>Byblis-1</i> | 0.393 | LS |
| <i>Byblis-1</i> | 0.46  | US |
| <i>Byblis-1</i> | 0.486 | US |
| <i>Byblis-1</i> | 0.325 | US |
| <i>Byblis-1</i> | 0.423 | LS |
| <i>Byblis-1</i> | 0.595 | LS |
| <i>Byblis-1</i> | 0.324 | LS |
| <i>Byblis-1</i> | 0.438 | US |
| <i>Byblis-1</i> | 0.362 | US |
| <i>Byblis-1</i> | 0.544 | US |
| <i>Byblis-1</i> | 0.641 | LS |
| <i>Byblis-1</i> | 0.377 | LS |
| <i>Byblis-1</i> | 0.55  | LS |
| <i>Byblis-1</i> | 0.445 | LS |
| <i>Byblis-1</i> | 0.393 | US |
| <i>Byblis-1</i> | 0.43  | US |
| <i>Byblis-1</i> | 0.399 | US |
| <i>Byblis-1</i> | 0.597 | LS |
| <i>Byblis-1</i> | 0.437 | LS |
| <i>Byblis-1</i> | 0.564 | LS |
| <i>Byblis-1</i> | 0.355 | LS |
| <i>Byblis-1</i> | 0.437 | US |
| <i>Byblis-1</i> | 0.279 | US |
| <i>Byblis-1</i> | 0.454 | LS |
| <i>Byblis-1</i> | 0.284 | LS |
| <i>Byblis-1</i> | 0.626 | LS |
| <i>Byblis-1</i> | 0.445 | LS |
| <i>Byblis-2</i> | 0.543 | US |
| <i>Byblis-2</i> | 0.635 | US |
| <i>Byblis-2</i> | 0.486 | LS |
| <i>Byblis-2</i> | 0.694 | LS |
| <i>Byblis-2</i> | 0.463 | LS |
| <i>Byblis-2</i> | 0.41  | LS |
| <i>Byblis-2</i> | 0.683 | LS |
| <i>Byblis-2</i> | 0.353 | LS |
| <i>Byblis-2</i> | 0.491 | LS |
| <i>Byblis-2</i> | 0.421 | LS |
| <i>Byblis-2</i> | 0.169 | US |
| <i>Byblis-2</i> | 0.815 | LS |
| <i>Byblis-2</i> | 0.589 | LS |
| <i>Byblis-2</i> | 0.847 | LS |
| <i>Byblis-2</i> | 0.534 | LS |

|                 |       |    |
|-----------------|-------|----|
| <i>Byblis-2</i> | 0.68  | US |
| <i>Byblis-2</i> | 0.282 | US |
| <i>Byblis-2</i> | 0.436 | US |
| <i>Byblis-2</i> | 0.377 | LS |
| <i>Byblis-2</i> | 0.377 | LS |
| <i>Byblis-2</i> | 1.263 | LS |
| <i>Byblis-2</i> | 0.715 | US |
| <i>Byblis-2</i> | 0.815 | US |
| <i>Byblis-2</i> | 0.769 | LS |
| <i>Byblis-2</i> | 0.55  | LS |
| <i>Byblis-2</i> | 0.601 | LS |
| <i>Byblis-2</i> | 0.464 | US |
| <i>Byblis-2</i> | 0.324 | US |
| <i>Byblis-2</i> | 0.432 | US |
| <i>Byblis-2</i> | 1.057 | LS |
| <i>Byblis-2</i> | 0.936 | LS |
| <i>Byblis-2</i> | 0.605 | LS |
| <i>Byblis-2</i> | 0.596 | LS |
| <i>Byblis-2</i> | 0.846 | LS |
| <i>Byblis-2</i> | 0.505 | LS |
| <i>Byblis-2</i> | 0.988 | LS |
| <i>Byblis-2</i> | 0.548 | LS |
| <i>Byblis-2</i> | 0.423 | LS |
| <i>Byblis-2</i> | 0.427 | US |
| <i>Byblis-2</i> | 0.513 | US |
| <i>Byblis-2</i> | 0.377 | US |
| <i>Byblis-2</i> | 0.452 | US |
| <i>Byblis-2</i> | 0.66  | LS |
| <i>Byblis-2</i> | 1.044 | LS |
| <i>Byblis-2</i> | 0.91  | LS |
| <i>Byblis-2</i> | 0.584 | LS |
| <i>Byblis-2</i> | 0.542 | LS |
| <i>Byblis-2</i> | 0.906 | LS |
| <i>Byblis-2</i> | 0.437 | LS |
| <i>Byblis-2</i> | 0.692 | LS |
| <i>Byblis-2</i> | 0.432 | LS |
| <i>Byblis-2</i> | 0.451 | LS |
| <i>Byblis-2</i> | 0.368 | US |
| <i>Byblis-2</i> | 0.856 | LS |
| <i>Byblis-2</i> | 0.321 | LS |
| <i>Byblis-2</i> | 0.662 | LS |
| <i>Byblis-2</i> | 0.606 | US |
| <i>Byblis-2</i> | 0.6   | LS |
| <i>Byblis-2</i> | 0.98  | LS |
| <i>Byblis-2</i> | 0.589 | LS |
| <i>Byblis-2</i> | 0.874 | LS |
| <i>Byblis-2</i> | 0.795 | LS |

|                 |       |    |
|-----------------|-------|----|
| <i>Byblis-2</i> | 1.178 | LS |
| <i>Byblis-2</i> | 0.814 | LS |
| <i>Byblis-2</i> | 0.339 | LS |
| <i>Byblis-2</i> | 0.537 | LS |
| <i>Byblis-2</i> | 0.966 | LS |
| <i>Byblis-2</i> | 0.708 | US |
| <i>Byblis-2</i> | 0.588 | US |
| <i>Byblis-2</i> | 0.483 | US |
| <i>Byblis-2</i> | 0.665 | US |
| <i>Byblis-2</i> | 0.43  | US |
| <i>Byblis-2</i> | 0.305 | US |
| <i>Byblis-2</i> | 0.467 | LS |
| <i>Byblis-2</i> | 1.193 | LS |
| <i>Byblis-2</i> | 0.713 | LS |
| <i>Byblis-2</i> | 0.311 | LS |
| <i>Byblis-2</i> | 0.575 | LS |
| <i>Byblis-2</i> | 0.615 | LS |
| <i>Byblis-2</i> | 0.252 | US |
| <i>Byblis-2</i> | 0.46  | US |
| <i>Byblis-2</i> | 0.437 | US |
| <i>Byblis-2</i> | 0.498 | US |
| <i>Byblis-2</i> | 0.423 | US |
| <i>Byblis-2</i> | 0.476 | US |
| <i>Byblis-2</i> | 0.52  | US |
| <i>Byblis-2</i> | 0.505 | LS |
| <i>Byblis-2</i> | 1.457 | LS |
| <i>Byblis-2</i> | 0.655 | US |
| <i>Byblis-2</i> | 0.597 | US |
| <i>Byblis-2</i> | 0.783 | US |
| <i>Byblis-2</i> | 0.524 | US |
| <i>Byblis-2</i> | 0.64  | US |
| <i>Byblis-2</i> | 0.29  | US |
| <i>Byblis-2</i> | 0.773 | LS |
| <i>Byblis-2</i> | 0.642 | LS |
| <i>Byblis-2</i> | 1.227 | LS |
| <i>Byblis-2</i> | 1.062 | LS |
| <i>Byblis-2</i> | 1.271 | LS |
| <i>Byblis-2</i> | 0.574 | US |
| <i>Byblis-2</i> | 0.94  | US |
| <i>Byblis-2</i> | 0.832 | US |
| <i>Byblis-2</i> | 0.777 | US |
| <i>Byblis-2</i> | 0.386 | LS |
| <i>Byblis-2</i> | 0.828 | LS |
| <i>Byblis-2</i> | 0.35  | LS |
| <i>Byblis-2</i> | 0.698 | LS |
| <i>Byblis-2</i> | 0.88  | LS |
| <i>Byblis-2</i> | 0.761 | LS |

|                 |        |    |
|-----------------|--------|----|
| <i>Byblis-2</i> | 0.415  | US |
| <i>Byblis-2</i> | 0.443  | US |
| <i>Byblis-2</i> | 0.691  | US |
| <i>Byblis-2</i> | 0.807  | US |
| <i>Byblis-2</i> | 0.729  | LS |
| <i>Byblis-2</i> | 0.771  | LS |
| <i>Byblis-2</i> | 1.214  | LS |
| <i>Byblis-2</i> | 0.399  | US |
| <i>Byblis-2</i> | 1.052  | US |
| <i>Byblis-2</i> | 0.874  | US |
| <i>Byblis-2</i> | 0.498  | US |
| <i>Byblis-2</i> | 0.754  | LS |
| <i>Byblis-2</i> | 0.671  | LS |
| <i>Byblis-2</i> | 1.269  | LS |
| <i>Byblis-2</i> | 1.176  | LS |
| <i>Byblis-2</i> | 0.725  | LS |
| <i>Byblis-2</i> | 1.3    | US |
| <i>Byblis-2</i> | 1.1951 | US |
| <i>Byblis-2</i> | 0.664  | US |
| <i>Byblis-2</i> | 1.394  | US |
| <i>Byblis-2</i> | 0.71   | US |
| <i>Byblis-2</i> | 0.98   | LS |
| <i>Byblis-2</i> | 0.966  | LS |
| <i>Byblis-2</i> | 1.022  | LS |
| <i>Byblis-2</i> | 1.512  | LS |
| <i>Byblis-2</i> | 1.186  | LS |
| <i>Byblis-2</i> | 1.078  | US |
| <i>Byblis-2</i> | 0.445  | US |
| <i>Byblis-2</i> | 0.838  | US |
| <i>Byblis-2</i> | 0.666  | US |
| <i>Byblis-2</i> | 0.875  | US |
| <i>Byblis-2</i> | 0.688  | US |
| <i>Byblis-2</i> | 0.808  | US |
| <i>Byblis-2</i> | 0.809  | US |
| <i>Byblis-2</i> | 1.295  | LS |
| <i>Byblis-2</i> | 0.808  | LS |
| <i>Byblis-2</i> | 0.902  | LS |
| <i>Byblis-2</i> | 0.517  | LS |
| <i>Byblis-2</i> | 0.748  | US |
| <i>Byblis-2</i> | 0.59   | US |
| <i>Byblis-2</i> | 1.271  | US |
| <i>Byblis-2</i> | 0.37   | US |
| <i>Byblis-2</i> | 0.498  | US |
| <i>Byblis-2</i> | 0.447  | LS |
| <i>Byblis-2</i> | 0.453  | LS |
| <i>Byblis-2</i> | 0.995  | LS |
| <i>Byblis-2</i> | 0.597  | US |

|                 |        |    |
|-----------------|--------|----|
| <i>Byblis-2</i> | 1.108  | US |
| <i>Byblis-2</i> | 0.822  | US |
| <i>Byblis-2</i> | 0.641  | LS |
| <i>Byblis-2</i> | 1.1    | LS |
| <i>Byblis-2</i> | 0.806  | LS |
| <i>Byblis-2</i> | 0.787  | LS |
| <i>Byblis-2</i> | 0.484  | US |
| <i>Byblis-2</i> | 0.475  | US |
| <i>Byblis-2</i> | 0.536  | US |
| <i>Byblis-2</i> | 0.528  | US |
| <i>Byblis-2</i> | 1.364  | LS |
| <i>Byblis-2</i> | 0.611  | LS |
| <i>Byblis-2</i> | 0.626  | LS |
| <i>Byblis-2</i> | 0.801  | US |
| <i>Byblis-2</i> | 0.912  | US |
| <i>Byblis-3</i> | 0.52   | US |
| <i>Byblis-3</i> | 0.46   | US |
| <i>Byblis-3</i> | 0.649  | US |
| <i>Byblis-3</i> | 0.513  | LS |
| <i>Byblis-3</i> | 0.385  | LS |
| <i>Byblis-3</i> | 0.731  | LS |
| <i>Byblis-3</i> | 1.228  | US |
| <i>Byblis-3</i> | 0.696  | US |
| <i>Byblis-3</i> | 0.735  | LS |
| <i>Byblis-3</i> | 0.47   | LS |
| <i>Byblis-3</i> | 0.445  | US |
| <i>Byblis-3</i> | 0.386  | US |
| <i>Byblis-3</i> | 1.481  | LS |
| <i>Byblis-3</i> | 1.161  | LS |
| <i>Byblis-3</i> | 1.1951 | LS |
| <i>Byblis-3</i> | 0.73   | LS |
| <i>Byblis-3</i> | 1.814  | US |
| <i>Byblis-3</i> | 1.128  | US |
| <i>Byblis-3</i> | 1.463  | US |
| <i>Byblis-3</i> | 2.155  | LS |
| <i>Byblis-3</i> | 1.448  | LS |
| <i>Byblis-3</i> | 0.583  | LS |
| <i>Byblis-3</i> | 1.297  | US |
| <i>Byblis-3</i> | 1.098  | US |
| <i>Byblis-3</i> | 0.477  | US |
| <i>Byblis-3</i> | 0.879  | US |
| <i>Byblis-3</i> | 2.361  | US |
| <i>Byblis-3</i> | 2.024  | US |
| <i>Byblis-3</i> | 2.329  | US |
| <i>Byblis-3</i> | 2.735  | US |
| <i>Byblis-3</i> | 2.157  | US |
| <i>Byblis-3</i> | 1.169  | US |

|                 |       |    |
|-----------------|-------|----|
| <i>Byblis-3</i> | 0.468 | US |
| <i>Byblis-3</i> | 0.784 | US |
| <i>Byblis-3</i> | 0.837 | US |
| <i>Byblis-3</i> | 0.309 | US |
| <i>Byblis-3</i> | 0.324 | US |
| <i>Byblis-3</i> | 0.81  | LS |
| <i>Byblis-3</i> | 0.409 | LS |
| <i>Byblis-3</i> | 0.432 | LS |
| <i>Byblis-3</i> | 0.74  | LS |
| <i>Byblis-3</i> | 0.679 | LS |
| <i>Byblis-3</i> | 0.448 | US |
| <i>Byblis-3</i> | 0.686 | US |
| <i>Byblis-3</i> | 0.305 | US |
| <i>Byblis-3</i> | 0.906 | LS |
| <i>Byblis-3</i> | 0.327 | LS |
| <i>Byblis-3</i> | 0.618 | LS |
| <i>Byblis-3</i> | 0.781 | LS |
| <i>Byblis-3</i> | 1.635 | LS |
| <i>Byblis-3</i> | 0.972 | LS |
| <i>Byblis-3</i> | 0.684 | US |
| <i>Byblis-3</i> | 1.201 | US |

**Table S2**

**Table S2.** Provides the original data for the stalked gland density measurements. US = upper surface of leaf; LS = lower surface of leaf.

| <b>Plant number</b> | <b>Number of stalked glands</b> | <b>Position on leaf</b> | <b>Leaf number</b> |
|---------------------|---------------------------------|-------------------------|--------------------|
| 1                   | 10                              | US                      | 1                  |
| 1                   | 15                              | LS                      | 1                  |
| 1                   | 5                               | US                      | 2                  |
| 1                   | 13                              | LS                      | 2                  |
| 1                   | 12                              | US                      | 3                  |
| 1                   | 20                              | LS                      | 3                  |
| 2                   | 8                               | US                      | 1                  |
| 2                   | 15                              | LS                      | 1                  |
| 2                   | 6                               | US                      | 2                  |
| 2                   | 14                              | LS                      | 2                  |
| 2                   | 8                               | US                      | 3                  |
| 2                   | 20                              | LS                      | 3                  |
| 3                   | 17                              | US                      | 1                  |
| 3                   | 21                              | LS                      | 1                  |
| 3                   | 10                              | US                      | 2                  |
| 3                   | 24                              | LS                      | 2                  |
| 3                   | 9                               | US                      | 3                  |
| 3                   | 21                              | LS                      | 3                  |
| 3                   | 9                               | US                      | 4                  |
| 3                   | 21                              | LS                      | 4                  |



### **Table S3**

**Table S3.** Provides the original data for the stalked gland reaction times and movement durations, relative humidity and temperature, and respective stalked gland lengths in the three stimulation scenarios. C = chemical stimulation; M = mechanical stimulation; C&M = combined chemical and mechanical stimulation.

| Stimulus scenario | Plant number | Leaf number | Stalked gland length [mm] | Reaction time [min] | Movement duration [min] | Relative humidity (minimum-maximum; mean) [%] | Temperature (minimum-maximum; mean) [°C] |
|-------------------|--------------|-------------|---------------------------|---------------------|-------------------------|-----------------------------------------------|------------------------------------------|
| C                 | 1            | 3           | 0.696                     | 24                  | 39                      | 33.7-36.2; 34.95                              | 24.3-25.3; 24.8                          |
| C                 | 1            | 2           | 0.292                     | 29                  | 15                      | 38.2-41.6; 39.9                               | 25.4-25.8; 25.6                          |
| C                 | 1            | 3           | 1.033                     | 31                  | 18                      | 38.5-41.7; 40.1                               | 24.2-25.2; 24.7                          |
| C                 | 1            | 3           | 0.429                     | 47                  | 25                      | 38.5-41.7; 40.1                               | 24.2-25.2; 24.7                          |
| C                 | 1            | 3           | 0.959                     | 35                  | 58                      | 37.9-42.8; 40.35                              | 24.1-24.6; 24.35                         |
| C                 | 1            | 2           | 0.9                       | 55                  | 58                      | 42.2-44.2; 43.4                               | 25.8-26.7; 26.25                         |
| C                 | 1            | 2           | 0.988                     | 39                  | 51                      | 42.6-44.2; 43.4                               | 25.8-26.7; 26.25                         |
| C                 | 1            | 2           | 0.855                     | 23                  | 29                      | 42.6-44.2; 43.4                               | 25.8-26.7; 26.25                         |
| C                 | 1            | 3           | 0.897                     | 45                  | 25                      | 47.2-48.7; 47.95                              | 25.8-26.1; 25.95                         |
| C                 | 1            | 3           | 0.475                     | 49                  | 24                      | 47.2-48.7; 47.95                              | 25.8-26.1; 25.95                         |
| C                 | 2            | 2           | 0.828                     | 62                  | 50                      | 39.0-45.5; 42.25                              | 25.2-26.1; 25.65                         |
| C                 | 2            | 2           | 0.752                     | 64                  | 39                      | 37.1-40.7; 38.9                               | 26.0-26.2; 26.1                          |
| C                 | 2            | 2           | 0.365                     | 61                  | 58                      | 37.1-40.7; 38.9                               | 26.0-26.2; 26.1                          |
| C                 | 2            | 2           | 0.836                     | 52                  | 58                      | 38.2-40.9; 39.55                              | 23.9-25.3; 24.6                          |
| C                 | 2            | 6           | 1.142                     | 50                  | 74                      | 38.6-41.1; 39.85                              | 24.1-24.4; 24.25                         |
| C                 | 2            | 5           | 1.066                     | 47                  | 43                      | 54.9-55.7; 55.3                               | 24.9-25.1; 25.0                          |
| C                 | 2            | 9           | 0.89                      | 44                  | 55                      | 45.1-46.4; 45.75                              | 27.7-27.8; 27.75                         |
| C                 | 2            | 10          | 1.149                     | 47                  | 36                      | 39.0-40.1; 39.55                              | 27.5-27.6; 27.55                         |
| C                 | 2            | 3           | 0.655                     | 30                  | 45                      | 40.6-42.5; 41.55                              | 26.7-26.7; 26.7                          |
| C                 | 2            | 9           | 1.301                     | 41                  | 60                      | 40.3-44.9; 42.6                               | 28.5-31.0; 29.75                         |
| C&M               | 1            | 2           | 0.755                     | 44                  | 26                      | 26.9-27.7; 27.3                               | 26.3-26.8; 26.55                         |
| C&M               | 1            | 2           | 0.744                     | 28                  | 16                      | 27.4-27.4; 27.4                               | 25.7-25.7; 25.7                          |
| C&M               | 1            | 3           | 0.671                     | 23                  | 27                      | 27.3-27.4; 27.35                              | 25.8-25.8; 25.8                          |
| C&M               | 1            | 6           | 0.841                     | 26                  | 32                      | 34.9-36.5; 35.7                               | 25.5-26.3; 25.9                          |
| C&M               | 1            | 6           | 0.784                     | 43                  | 29                      | 33.7-34.4; 34.05                              | 26.5-26.9; 26.7                          |
| C&M               | 1            | 3           | 1.181                     | 31                  | 52                      | 40.0-42.1; 41.05                              | 26.0-26.1; 26.05                         |
| C&M               | 1            | 7           | 0.973                     | 60                  | 48                      | 38.5-40.6; 39.55                              | 28.3-30.0; 29.15                         |
| C&M               | 1            | 2           | 1.322                     | 17                  | 30                      | 40.3-41.1; 40.7                               | 27.3-27.4; 27.35                         |
| C&M               | 1            | 2           | 1.123                     | 33                  | 44                      | 55.4-55.5; 55.45                              | 24.5-25.2; 24.85                         |

|     |   |    |       |           |           |                  |                  |
|-----|---|----|-------|-----------|-----------|------------------|------------------|
| C&M | 1 | 6  | 1.242 | 37        | 51        | 50.0-51.7; 50.85 | 26.6-27.0; 26.8  |
| C&M | 2 | 2  | 0.897 | 52        | 47        | 36.2-37.6; 36.9  | 26.9-26.9; 26.9  |
| C&M | 2 | 8  | 0.924 | 64        | 71        | 37.1-38.8; 37.95 | 26.4-26.8; 26.6  |
| C&M | 2 | 2  | 0.982 | 47        | 69        | 49.0-52.0; 50.5  | 23.2-25.1; 24.15 |
| C&M | 2 | 9  | 0.943 | 32        | 62        | 44.4-45.1; 44.75 | 26.2-26.3; 26.25 |
| C&M | 2 | 9  | 0.661 | 64        | 18        | 42.7-43.5; 43.1  | 24.4-25.1; 24.75 |
| C&M | 2 | 2  | 1.056 | 43        | 34        | 29.2-40.0; 34.6  | 28.5-34.6; 31.55 |
| C&M | 2 | 8  | 1.006 | 64        | 57        | 46.5-46.6; 46.55 | 27.3-27.6; 27.45 |
| C&M | 2 | 10 | 0.912 | 55        | 51        | 47.0-47.6; 47.3  | 27.2-27.3; 27.25 |
| C&M | 2 | 10 | 1.128 | 76        | 34        | 37.9-39.7; 38.8  | 27.4-27.7; 27.55 |
| C&M | 2 | 2  | 0.783 | 79        | 24        | 40.2-41.2; 40.7  | 27.8-27.8; 27.8  |
| M   | 1 | 3  | 0.642 | no motion | no motion | 32.6-34.7; 33.65 | 25.1-25.2; 25.15 |
| M   | 1 | 3  | 0.463 | no motion | no motion | 32.6-34.7; 33.65 | 25.1-25.2; 25.15 |
| M   | 1 | 2  | 0.859 | no motion | no motion | 31.3-31.8; 31.55 | 24.-24.8; 24.8   |
| M   | 1 | 2  | 0.571 | no motion | no motion | 31.3-31.8; 31.55 | 24.-24.8; 24.8   |
| M   | 1 | 2  | 0.647 | no motion | no motion | 31.3-31.8; 31.55 | 24.-24.8; 24.8   |
| M   | 2 | 2  | 0.800 | no motion | no motion | 36.0-37.5; 36.75 | 24.7-25.2; 24.95 |
| M   | 2 | 2  | 1.017 | no motion | no motion | 36.0-37.5; 36.75 | 24.7-25.2; 24.95 |
| M   | 2 | 6  | 0.651 | no motion | no motion | 38.4-38.4; 38.4  | 25.0-25.1; 25.05 |
| M   | 2 | 6  | 0.583 | no motion | no motion | 38.4-38.4; 38.4  | 25.0-25.1; 25.05 |
| M   | 2 | 6  | 0.578 | no motion | no motion | 38.4-38.4; 38.4  | 25.0-25.1; 25.05 |

## Table S4

**Table S4.** Provides the original data for the measured reaction times and movement durations in the two temperature regimes, i.e., warm (22 °C) vs. cold (12 °C).

| Reaction time<br>[min] @ 22° C | Movement duration<br>[min] @ 22° C | Reaction time<br>[min] @ 12° C | Movement duration<br>[min] @ 12° C |
|--------------------------------|------------------------------------|--------------------------------|------------------------------------|
| 40                             | 56                                 | 52                             | 68                                 |
| 28                             | 44                                 | 54                             | 73                                 |
| 46                             | 42                                 | 84                             | 53                                 |
| 34                             | 55                                 | 56                             | 89                                 |
| 38                             | 51                                 | 63                             | 92                                 |
| 24                             | 42                                 | 48                             | 103                                |
| 50                             | 63                                 | 44                             | 82                                 |
| 41                             | 58                                 | 38                             |                                    |

**Table S5**

**Table S5.** Provides the original data for the cellulose microfibril angle measurements on the five different stalked gland sections.

| <b>Stalk cell<br/>number</b> | <b>Section 1<br/>[°]</b> | <b>Section 2<br/>[°]</b> | <b>Section 3<br/>[°]</b> | <b>Section 4<br/>[°]</b> | <b>Section 5<br/>[°]</b> |
|------------------------------|--------------------------|--------------------------|--------------------------|--------------------------|--------------------------|
| 1                            | 42.8                     | 38.5                     | 32.3                     | 31.3                     | 21.8                     |
| 2                            | 45.2                     | 39.7                     | 34.8                     | 33.9                     | 30.6                     |
| 3                            | 41.7                     | 36.9                     | 37.9                     | 33.9                     | 27.2                     |
| 4                            | 33.5                     | 33.7                     | 30.6                     | --                       | --                       |
| 5                            | 41                       | 45.6                     | 28.3                     | 26.1                     | 27.9                     |
| 6                            | 38.9                     | 37.5                     | 35.3                     | 35.4                     | 26.1                     |
| 7                            | 37.2                     | 33.8                     | 35.8                     | 28.7                     | 22.6                     |
| 8                            | --                       | --                       | --                       | 30.7                     | 24.7                     |
| 9                            | 38.9                     | 36.5                     | 30.4                     | 33.2                     | 25.3                     |
| 10                           | 36.2                     | 34.9                     | 35.4                     | 32.3                     | 26                       |
| 11                           | 38.5                     | 37.8                     | 30.5                     | 32.6                     | 18.4                     |
| 12                           | 37.6                     | 39.5                     | 36.4                     | 34.1                     | 23.8                     |
| 13                           | 42.9                     | 37.8                     | 32.7                     | 32.1                     | 25                       |
| 14                           | 40.2                     | 36.8                     | 32                       | 31.3                     | 27.5                     |
| 15                           | 38                       | 37.5                     | 38.3                     | 33.4                     | 23.3                     |
| 16                           | 39.4                     | 39.3                     | 41                       | 38.9                     | 26                       |
| 17                           | 52.9                     | 44.7                     | 43.6                     | 40.6                     | 28.1                     |
| 18                           | 50.3                     | 42.3                     | 42.9                     | 41.6                     | 32.5                     |
